# Supplementary material for: Spatially-directed magnetic molecularly imprinted polymers with good anti-interference for simultaneous enrichment and detection of dual disease-related bio-indicators
Source: Royal Society of Chemistry journal article supplement (doi:10.1039/d2nr03356a), 2022-01-01
Supplement: d2nr03356a1.pdf [file d2nr03356a1.pdf]

1 **SUPPORTING INFORMATION**

2

3 **Spatially-directed Magnetic Molecularly Imprinted**  
4 **Polymers with Good Anti-interference for Simultaneous**  
5 **Enrichment and Detection of Dual Disease-related Bio-**  
6 **indicators**

7 Huijia Song <sup>a,†</sup>, Feng Wang <sup>a,†</sup>, Yayun Zhao <sup>a</sup>, Ruixia Gao <sup>\*a</sup>, Yulian He <sup>c</sup>, Qing Yan <sup>d</sup>,  
8 Xiaoyi Chen <sup>d</sup>, Lisa D. Pfefferle <sup>e</sup>, Silong Xu <sup>a</sup>, Ying Sheng <sup>\*a,b</sup>

9 <sup>a</sup> *School of Chemistry, Xi'an Jiaotong University, Xi'an, Shaanxi 710049, China*

10 <sup>b</sup> *Department of Otolaryngology Head and Neck Surgery, The Second Affiliated*  
11 *Hospital of Xi'an Jiaotong University, Xi'an, Shaanxi 710004, China*

12 <sup>c</sup> *University of Michigan—Shanghai Jiaotong University Joint Institute, Shanghai*  
13 *200240, China*

14 <sup>d</sup> *School of Medicine, Xi'an Jiaotong University, Xi'an, Shaanxi 710061, China*

15 <sup>e</sup> *Department of Chemical & Environmental Engineering, Yale University, New Haven,*  
16 *Connecticut 06520-8286, United States*

17 † Huijia Song and Feng Wang contributed equally to this work and are co-first authors.

18 \* Corresponding authors: Tel.: +86 29 82655399; fax: +86 29 82655399.

19 E-mail: ruixiagao@xjtu.edu.cn (R. Gao)

20 15229217817@163.com (Y. Sheng)

21

## 22 **1. Instrumentation**

23 Images of transmission electron microscopy were obtained using a JEM-2100  
24 transmission electron microscope (TEM, JEOL Co., Japan). Hysteresis loops were  
25 acquired by a 9600-1 vibrating sample magnetometer (VSM, LDJ Co., USA) for testing  
26 the magnetic properties of resultant materials. X-ray diffraction patterns were recorded  
27 with a Rigaku D/max/2500v/pc X-ray diffractometer (Rigaku Co., Japan) with Cu  $K\alpha$   
28 radiation to identify the crystalline phase of nanomaterials. A Nicolet AVATAR-330  
29 Fourier-transform infrared spectrophotometer (FTIR) (Thermo Electron Co. USA) was  
30 utilized by the KBr pressing method. An automatic elemental analyzer (EL,  
31 EUROVECTOR EA3000, Italy) was used to obtain elemental contents. The HPLC  
32 analyses were conducted using a Hitachi L-2130 HPLC system (Japan) equipped with  
33 a binary pump, an ultraviolet detector, and a C18 chromatographic column (150  
34 mm×4.6 mm, 5  $\mu$ m, Shimadzu, VP-ODS). The optimized mobile phase was  
35 acetonitrile-ultrapure water (5:95, v/v) with regular flow rate of 0.5 mL/min and  
36 injection volume of 10  $\mu$ L. The column temperature was 40 °C, and the detection  
37 wavelength was operated at 283 nm.

38

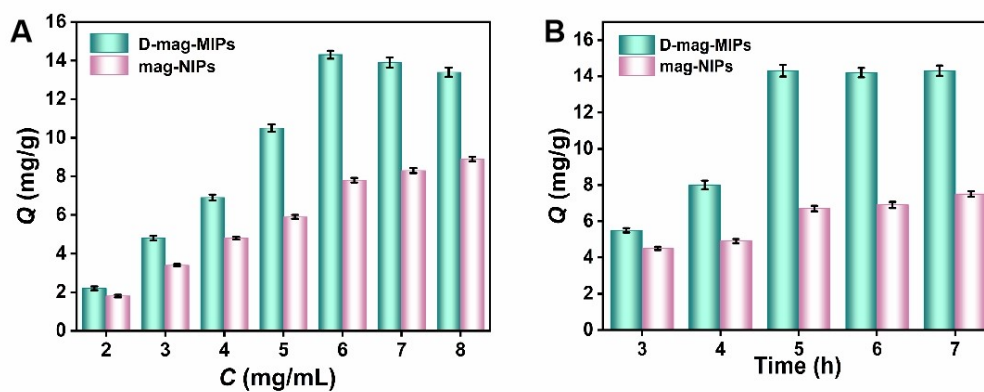

39

40 **Fig. S1.** The effect of the amount of PEI (A) and polymerization time (B) on the  
 41 imprinting performance of D-mag-MIPs and mag-NIPs towards DOPAC.

42

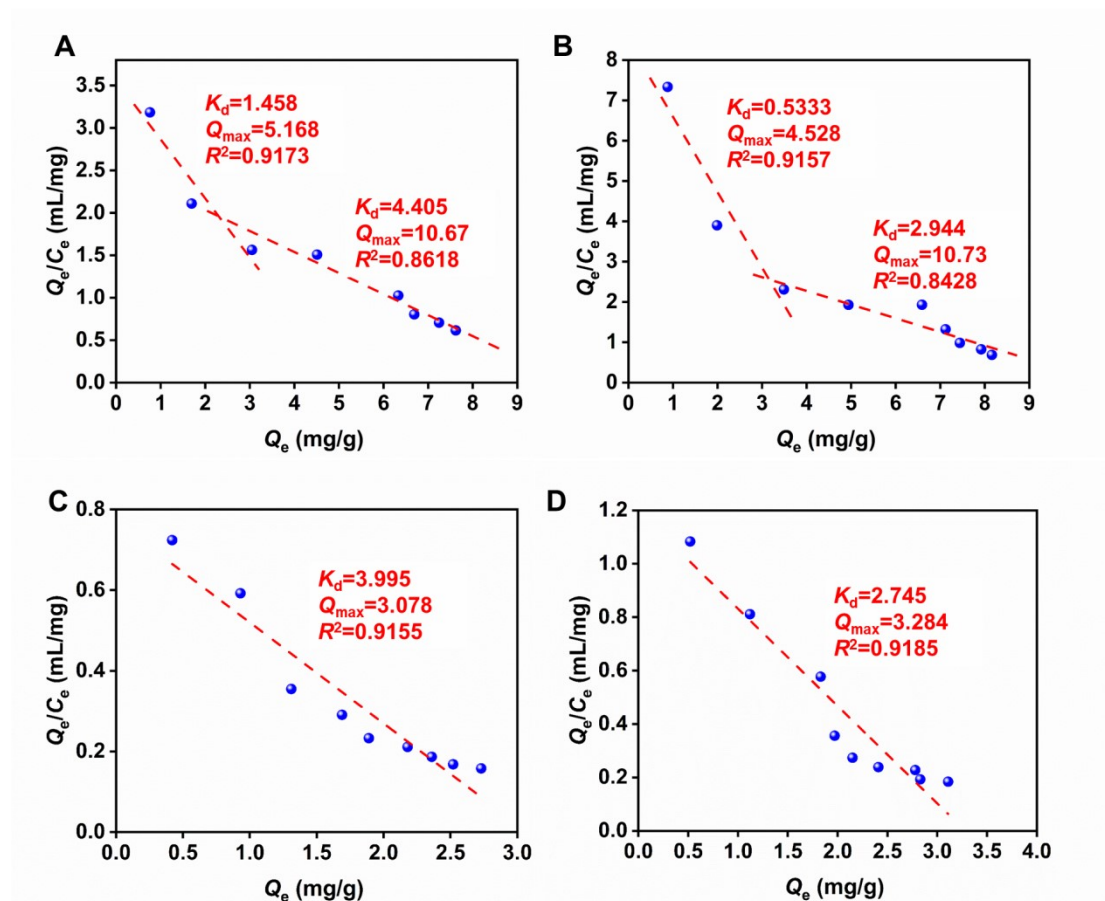

43

44 **Fig. S2.** Scatchard plots for D-mag-MIPs towards DA (A) and DOPAC (B). Scatchard  
 45 plots for mag-NIPs towards DA (C) and DOPAC (D).

46

47

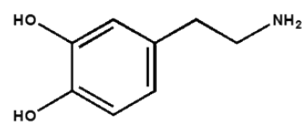

DA

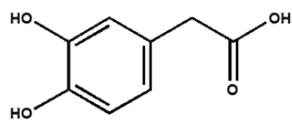

DOPAC

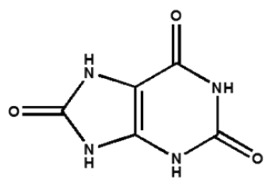

UA

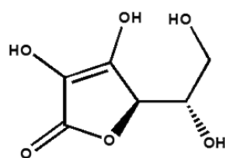

AA

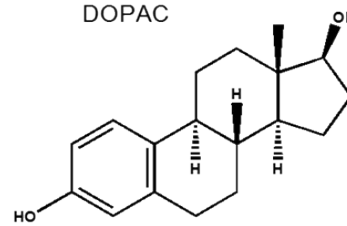

E2

48

49 **Fig. S3.** Chemical structures of DA, DOPAC, and their coexisting competitors.

50

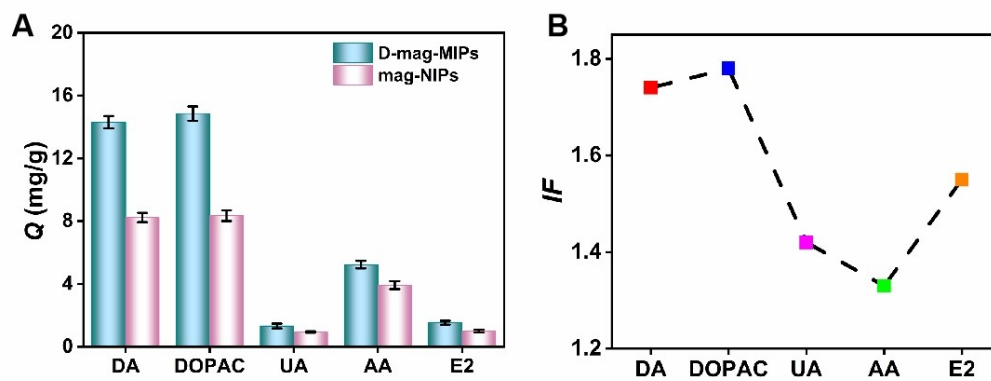

51

52 **Fig. S4.** Selective adsorption capacity (A) and  $IF$  (B) of D-mag-MIPs and mag-NIPs

53 towards different compounds in the single solutions.

54

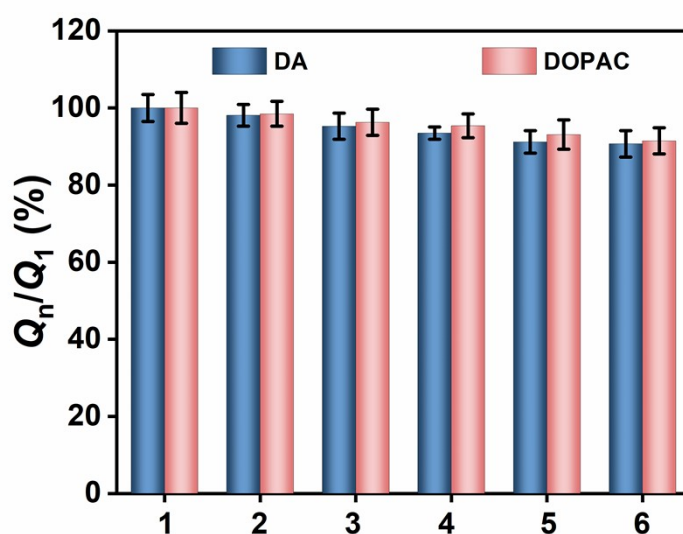

55

56 **Fig. S5.** The reusability test of D-mag-MIPs after six adsorption-desorption cycles.

57 To assess the reusability, which is of great importance when it comes to transitioning

58 from lab scales to any realistic practical applications, we performed six adsorption-

59 desorption cycles on the same D-mag-MIPs (Fig. S5). The adsorption capacities of D-

60 mag-MIPs for DA and DOPAC show a slight decrease after 6 cycles, likely due to the

61 minor destruction of imprinted cavities caused by the ethanol-HAC (98:2, v/v) eluent

62 used to remove the adsorbed templates by disruption the interaction between templates

63 and functional monomer. However, it still maintains above 91% of the initial adsorption

64 amount, revealing that D-mag-MIPs are stable and possess good reusability in

65 applications.

66

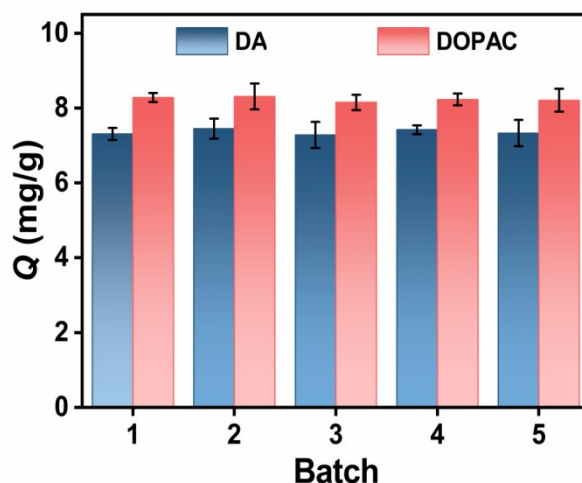

67 **Fig. S6.** The reproducibility of D-mag-MIPs prepared in five batches.

68 To investigate the long-term utilization of D-mag-MIPs, the reproducibility of  
69 obtained nanomaterials were tested. Five different batches of D-mag-MIPs were  
70 synthesized on different days. The adsorption of DA and DOPAC on each batch of  
71 nanomaterials was performed by five times independently (Fig. S6). The average  $Q$   
72 values of the different batches of D-mag-MIPs towards DA and DOPAC are found to  
73 be 7.35 and 8.24 mg/g with RSD <5.5% and 6.2%, respectively. These results  
74 demonstrate that D-mag-MIPs possess satisfactory reproducibility, indicating the  
75 satisfactory stability of the prepared nanomaterials.

76



77 **Table S1** The adsorption kinetic constants for pseudo-first-order and pseudo-second-  
 78 order rate kinetic models of D-mag-MIPs.

| Sorbents   | Targets | Pseudo-first-order |                 | Pseudo-second-order |                     |                     |
|------------|---------|--------------------|-----------------|---------------------|---------------------|---------------------|
|            |         | $R^2$              | $k_1$<br>(/min) | $R^2$               | $k_2$<br>(g/mg·min) | $v_0$<br>(mg/g·min) |
| D-mag-MIPs | DA      | 0.8631             | 0.5977          | 0.9563              | 0.0296              | 3.292               |
|            | DOPAC   | 0.9068             | 0.5370          | 0.9775              | 0.0473              | 5.030               |

79

80

81 **Table S2.** Adsorption equilibrium constants for *Langmuir* and *Freundlich* isothermal

82 fitting constants of D-mag-MIPs.

| Sorbents   | Targets | $Q_{e,E}$<br>(mg/g) | <i>Langmuir</i> isothermal equation |                     |               | <i>Freundlich</i> isothermal equation |               |        |
|------------|---------|---------------------|-------------------------------------|---------------------|---------------|---------------------------------------|---------------|--------|
|            |         |                     | $R^2$                               | $Q_{m,L}$<br>(mg/g) | $K_L$ (mL/mg) | $R^2$                                 | $K_F$ (mL/mg) | $n$    |
| D-mag-MIPs | DA      | 7.52                | 0.9936                              | 8.7873              | 0.3671        | 0.9352                                | 2.0422        | 0.5268 |
|            | DOPAC   | 8.16                | 0.9967                              | 9.0334              | 0.6123        | 0.9396                                | 2.8035        | 0.4473 |

83  $Q_{e,E}$  is the experimental value of  $Q_e$ ;

84  $Q_{m,L}$  is the calculated value of  $Q_e$  by *Langmuir* isotherm equation.

85

87 **Table S3.** The performance parameters of D-mag-MIPs-HLPC method for DA and

88 DOPAC detection. ( $n=5$ )

| Analyte | Linearity range<br>( $\mu\text{g/mL}$ ) | $R^2$  | RSD (%)   |           | LOD<br>( $\mu\text{g/mL}$ ) | LOQ<br>( $\mu\text{g/mL}$ ) |
|---------|-----------------------------------------|--------|-----------|-----------|-----------------------------|-----------------------------|
|         |                                         |        | intra-day | inter-day |                             |                             |
| DA      | 0.10-100                                | 0.9981 | 1.5-3.3   | 2.8-3.9   | 0.020                       | 0.065                       |
| DOPAC   | 0.10-100                                | 0.9987 | 1.6-3.1   | 2.3-3.6   | 0.031                       | 0.096                       |

**Table S4.** Comparison with other methods for detection of DA or DOPAC.

| Analytical system           | Linear range ( $\mu\text{g/mL}$ ) | RSD (%)   |           | LOD <sub>DA/DOPAC</sub> ( $\mu\text{g/mL}$ ) | Spiking concentration ( $\mu\text{g/mL}$ ) | Sample      | Recovery (%) | RSD (%) | Reusability           | Magnetic Separation | Ref.      |
|-----------------------------|-----------------------------------|-----------|-----------|----------------------------------------------|--------------------------------------------|-------------|--------------|---------|-----------------------|---------------------|-----------|
|                             |                                   | intra-day | inter-day |                                              |                                            |             |              |         |                       |                     |           |
| GEM <sup>a</sup>            | 0.61-15.3                         | --        | --        | 0.404 / --                                   | --/--                                      | --          | --/--        | --/--   | --                    | No                  | [35]      |
| CS/N,GODs@SPCE <sup>b</sup> | 0.16-15.3                         | 0.9       | --        | 0.023/ --                                    | 4.5                                        | Human urine | ~ 100        | 2.0     | 94.5 (after 1 month)  | No                  | [36]      |
| DE-MIPs <sup>c</sup>        | 0-0.183                           | --        | --        | 0.023/--                                     | 3.0,1.2, 45.9, 91.8                        | Human serum | 100.1-103.8  | 3.6-4.9 | --                    | No                  | [37]      |
| MISPE-HPLC-FL <sup>d</sup>  | 0.15-2.23                         | 2.2-4.6   | 1.6-4.7   | 0.025/ --                                    | 0.15, 0.3, 0.76, 1.5, 2.3                  | Human urine | 98.3-101.1   | --      | --                    | No                  | [38]      |
| D-mag-MIPs-HPLC-UV          | 0.1-100                           | 1.5-3.1   | 2.3-3.9   | 0.020/ 0.031                                 | 0.1, 1.0, 5.0                              | Human urine | 95.5-98.6    | 2.7-5.1 | 91.0 (after 6 cycles) | Yes                 | This work |

a: Graphene modified electrode.

b: Nitrogen-doped graphene quantum dots-chitosan nanocomposite-modified nanostructured screen printed carbon electrode.

c: Dual-emission fluorescent molecularly imprinted polymers.

d: Molecularly imprinted solidphase extraction.
